# Supplementary material for: Estimating the Health‐Related Costs of 10 Climate‐Sensitive U.S. Events During 2012
Source: PubMed Central journal article supplement — Geohealth. 2019 Sep 17;3(9):245–65. doi: 10.1029/2019GH000202 (PMC7007172; doi:10.1029/2019gh000202), 2019-09-17
Supplement: GH2-3-245-s001.pdf [file GH2-3-245-s001.pdf]

**Estimating the Health-Related Costs of Ten Climate-Sensitive US Events During 2012**

Vijay S. Limaye<sup>1\*</sup>, Wendy Max<sup>2</sup>, Juanita Constible<sup>1</sup>, Kim Knowlton<sup>1,3</sup>

<sup>1</sup>Natural Resources Defense Council, New York, NY 10011, USA; jconstible@nrdc.org, ORCID 0000-0002-2642-4608 (J.C.); kknowlton@nrdc.org, ORCID 0000-0002-8075-7817 (K.K.)

<sup>2</sup>Institute for Health & Aging, University of California San Francisco, San Francisco, CA 94118, USA; wendy.max@ucsf.edu, ORCID 0000-0002-4040-1592

<sup>3</sup>Mailman School of Public Health, Columbia University, New York, NY 10032, USA

\*Corresponding author: vlimaye@nrdc.org, ORCID 0000-0003-3118-6912, Tel.: +1-212-727-4683, Fax: +1-212-727-1773

**Contents of this file**

**Directly Reported and Estimated Health Impacts for Case Study Events ..... 1**

**Sensitivity Analysis Methods..... 7**

**Sensitivity Analysis Results ..... 8**

**Discussion Notes..... 9**

**State vs. National Health Impacts ..... 10**

**References for Supplemental Material..... 10**

**Directly Reported and Estimated Health Impacts for Case Study Events**

| Event | State | # Deaths (Reported) | Source | # Imputed Deaths (HCUP) | ICD-9 Code(s) | Diagnosis | # HA (red if imputed) | # ED (red if imputed) | Source |
|-------|-------|---------------------|--------|-------------------------|---------------|-----------|-----------------------|-----------------------|--------|
|-------|-------|---------------------|--------|-------------------------|---------------|-----------|-----------------------|-----------------------|--------|

|               |          |     |                                                                    |     |                |                                 |       |         |                                                 |
|---------------|----------|-----|--------------------------------------------------------------------|-----|----------------|---------------------------------|-------|---------|-------------------------------------------------|
| Lyme disease  | MI       | 0   |                                                                    | 0.0 | 322.9          | Meningitis                      | 1.6   | 0.8     | CDC (2017)                                      |
| Lyme disease  | MI       |     |                                                                    |     | 695.9          | Erythema migrans rash           | 56.8  | 1.6     | CDC (2017)                                      |
| Lyme disease  | MI       |     |                                                                    |     | 351            | Facial palsy                    | 72    | 5.1     | CDC (2017)                                      |
| Lyme disease  | MI       |     |                                                                    |     | 357            | Radiculoneuropathy              | 3.2   | 0.4     | CDC (2017)                                      |
| Lyme disease  | MI       |     |                                                                    |     | 422            | Carditis                        | 0.8   | 0.1     | CDC (2017)                                      |
| Lyme disease  | MI       |     |                                                                    |     | 714            | Arthritis                       | 22.4  | 3.1     | CDC (2017)                                      |
| Lyme disease  | MI TOTAL | 0.0 |                                                                    | 0.0 |                |                                 | 156.8 | 11.1    |                                                 |
| All. Pollen   | NC       | 0   |                                                                    | 3.5 | 493.XX         | ED Visit, Asthma                | 183.1 | 1149.0  | Anenberg et al. (2017), Sun et al. (2016)       |
| All. Pollen   | NC TOTAL | 0.0 |                                                                    | 3.5 |                |                                 | 183.1 | 1,149.0 |                                                 |
| Extr. weather | OH       | 8   | NOAA HazStat (2012), Ohio State Emergency Operations Center (2012) |     | 493.XX         | Asthma                          | 18.0  | 113.0   | Brokamp et al. (2017)                           |
| Extr. Weather | OH       |     |                                                                    |     | 001-009        | Gastrointestinal Illness        | 8.3   | 147.0   | Brokamp et al. (2017)                           |
| Extr. Weather | OH       |     |                                                                    |     | 686.9          | Skin and Soft Tissue Infection  | 8.9   | 83.0    | Brokamp et al. (2017)                           |
| Extr. Weather | OH       |     |                                                                    |     | 460–465, 466.0 | Acute Respiratory Infection     | 2.0   | 0.0     | Beer et al. (2015)                              |
| Extr. weather | OH TOTAL | 8.0 |                                                                    | 0.0 |                |                                 | 37.2  | 342.9   |                                                 |
| Extr. heat    | WI       | 27  | Christenson et al. (2013)                                          | 0.0 | 992.0          | Heat Stroke and Sunstroke       | 29.1  | 17.9    | CDC Environmental Public Health Tracking (2012) |
| Extr. heat    | WI       |     |                                                                    |     | 992.1          | Heat Syncope                    | 1.5   | 17.9    | CDC Environmental Public Health Tracking (2012) |
| Extr. heat    | WI       |     |                                                                    |     | 992.2          | Heat Cramps                     | 1.5   | 17.9    | CDC Environmental Public Health Tracking (2012) |
| Extr. heat    | WI       |     |                                                                    |     | 992.3          | Heat Exhaustion, Anhydrotic     | 1.5   | 17.9    | CDC Environmental Public Health Tracking (2012) |
| Extr. heat    | WI       |     |                                                                    |     | 992.4          | Heat Exhaustion, Salt Depletion | 1.5   | 17.9    | CDC Environmental Public Health Tracking (2012) |
| Extr. heat    | WI       |     |                                                                    |     | 992.5          | Heat Exhaustion, Unspecified    | 52.4  | 722.8   | CDC Environmental Public Health Tracking (2012) |
| Extr. heat    | WI       |     |                                                                    |     | 992.6          | Heat Fatigue, Transient         | 1.5   | 17.9    | CDC Environmental Public Health Tracking (2012) |
| Extr. heat    | WI       |     |                                                                    |     | 992.7          | Heat Edema                      | 1.5   | 17.9    | CDC Environmental Public Health Tracking (2012) |

|            |          |       |                               |      |                                                                               |                                    |         |         |                                                 |
|------------|----------|-------|-------------------------------|------|-------------------------------------------------------------------------------|------------------------------------|---------|---------|-------------------------------------------------|
| Extr. heat | WI       |       |                               |      | 992.8                                                                         | Other Specified Heat Effects       | 1.5     | 17.9    | CDC Environmental Public Health Tracking (2012) |
| Extr. heat | WI       |       |                               |      | 992.9                                                                         | Unspecified Effects Heat and Light | 1.5     | 17.9    | CDC Environmental Public Health Tracking (2012) |
| Extr. heat | WI       |       |                               |      | E900                                                                          | Excessive Heat: Weather            | 52.4    | 582.8   | CDC Environmental Public Health Tracking (2012) |
| Extr. heat | WI       |       |                               |      | E900.9                                                                        | Exposure to excessive natural heat | 9.1     | 153.6   | CDC Environmental Public Health Tracking (2012) |
| Extr. heat | WI TOTAL | 27.0  |                               | 0.0  |                                                                               |                                    | 155.0   | 1,620.0 |                                                 |
| Ozone      | NV       | 97.0  | Cromar et al. (2016)          | 0.0  | 518.81                                                                        | HA Respiratory                     | 26.1    | 95.7    | Cromar et al. (2016)                            |
| Ozone      | NV       |       |                               |      | 518.89                                                                        | HA Chronic Lung Disease            | 72.2    | 26.1    | Cromar et al. (2016)                            |
| Ozone      | NV       |       |                               |      | 493.XX                                                                        | ED Visit, Asthma                   | 15.3    | 72.2    | Cromar et al. (2016)                            |
| Ozone      | NV TOTAL | 97.0  |                               | 0.0  |                                                                               |                                    | 113.6   | 194.0   |                                                 |
| WNV        | TX       | 89.0  | CDC (2012)                    |      | 66.4                                                                          | Fever                              | 1,057.2 | 1868.0  | Chung et al. (2013)                             |
| WNV        | TX       |       |                               |      | 322.9                                                                         | Meningitis                         | 182.9   | 361.4   | Chung et al. (2013)                             |
| WNV        | TX       |       |                               |      | 66.41                                                                         | Encephalitis                       | 377.9   | 431.8   | Chung et al. (2013)                             |
| WNV        | TX       |       |                               |      | 344.89                                                                        | Acute flaccid paralysis            | 3.3     | 4.7     | Chung et al. (2013)                             |
| WNV        | TX       |       |                               |      | 378.52                                                                        | Cranial nerve palsy                | 6.2     | 14.1    | Chung et al. (2013)                             |
| WNV        | TX TOTAL | 89.0  |                               | 0.0  |                                                                               |                                    | 1,627.5 | 2,680.0 |                                                 |
| Wildfires  | CO       | 3.0   | NOAA (2012), Munich RE (2017) | 0.04 | 493–786.07                                                                    | Asthma & Wheeze (all ages)         | 156.1   | 838.3   | Alman et al. (2016), Fann et al. (2018)         |
| Wildfires  | CO       | 170.6 | Fann et al. (2018)            | 0.01 | 460–465, 466.0                                                                | Upper Respiratory Infection        | 5.7     | 316.6   | Alman et al. (2016), Fann et al. (2018)         |
| Wildfires  | CO       |       |                               | 0.08 | 480–486                                                                       | Pneumonia                          | 56.7    | 126.7   | Alman et al. (2016), Fann et al. (2018)         |
| Wildfires  | CO       |       |                               |      | 490                                                                           | Bronchitis                         | 0.9     | 62.1    | Alman et al. (2016), Fann et al. (2018)         |
| Wildfires  | CO       |       |                               | 0.03 | 491, 492, 496                                                                 | COPD                               | 1.1     | 15.5    | Alman et al. (2016), Fann et al. (2018)         |
| Wildfires  | CO       |       |                               |      | 460–465, 466.0, 466.1, 466.11, 466.19, 480–486, 487, 488, 490, 491, 492, 496, | Respiratory Disease (all ages)     | 0.7     | 3.9     | Alman et al. (2016), Fann et al. (2018)         |

|                 |          |                       |                                      |      |                                                                                          |                                |          |         |                                         |
|-----------------|----------|-----------------------|--------------------------------------|------|------------------------------------------------------------------------------------------|--------------------------------|----------|---------|-----------------------------------------|
|                 |          |                       |                                      |      | 493–786.07                                                                               |                                |          |         |                                         |
| Wildfires       | CO       |                       |                                      | 0.2  | 410                                                                                      | Acute myocardial infarction    | 35.1     | 68.5    | Alman et al. (2016), Fann et al. (2018) |
| Wildfires       | CO TOTAL | 173.6                 |                                      | 0.3  |                                                                                          |                                | 256.4    | 1,431.7 |                                         |
| HABs            | FL       | 0                     |                                      | 0.0  | 460–465, 466.0, 466.1, 466.11, 466.19, 480–486, 487, 488, 490, 491, 492, 496, 493–786.07 | Respiratory Disease fall ages) | 4,973.0  | 1,858.8 | Hoagland et al. (2014)                  |
| HABs            | FL       |                       |                                      |      | 520–579.9                                                                                | Digestive System Disease       | 6,092.8  | 1,998.6 | Hoagland et al. (2014)                  |
| HABs            | FL TOTAL | 0.0                   |                                      | 0.0  |                                                                                          |                                | 11,065.8 | 3,857.4 |                                         |
| Wildfires       | WA       | 1                     | Nat'l Interagency Fire Center (2012) | 0.02 | 493–786.07                                                                               | Asthma & Wheeze (all ages)     | 67.3     | 361.6   | Gan et al. (2017), Fann et al. (2018)   |
| Wildfires       | WA       | 243.2                 | Fann et al. (2018)                   | 0.01 | 460-519                                                                                  | Respiratory                    | 16.3     | 905.6   | Gan et al. (2017), Fann et al. (2018)   |
| Wildfires       | WA       |                       |                                      |      | 490                                                                                      | Bronchitis                     | 0.1      | 5.3     | Gan et al. (2017), Fann et al. (2018)   |
| Wildfires       | WA       |                       |                                      | 0.09 | 491, 492, 496                                                                            | COPD                           | 3.1      | 42.1    | Gan et al. (2017), Fann et al. (2018)   |
| Wildfires       | WA       |                       |                                      | 0.32 | 410                                                                                      | Acute myocardial infarction    | 75.7     | 147.6   | Gan et al. (2017), Fann et al. (2018)   |
| Wildfires       | WA       |                       |                                      | 0.26 | 480-486                                                                                  | Pneumonia                      | 187.9    | 420.0   | Gan et al. (2017), Fann et al. (2018)   |
| Wildfires       | WA       |                       |                                      |      | 410–414, 427, 428, 433–437, 440, 443, 444, 451–453                                       | Cardiovascular disease         | 16.6     |         | Gan et al. (2017), Fann et al. (2018)   |
| Wildfires       | WA       |                       |                                      |      | 437.9                                                                                    | Cerebrovascular disease        | 1.8      | 4.1     | Gan et al. (2017), Fann et al. (2018)   |
| Wildfires       | WA TOTAL | 244.2                 |                                      | 0.7  |                                                                                          |                                | 370.7    | 1897.3  |                                         |
| Hurricane Sandy | NJ       | 159 (Sandy USA total) | Diakakis et al. (2015)               | 0.0  | 410.XX                                                                                   | Myocardial infarction          | 3,546.0  | 0.0     | Swerdel et al. (2014)                   |

|                 |    |      |                       |                                                                                                                         |                                                     |         |       |                           |
|-----------------|----|------|-----------------------|-------------------------------------------------------------------------------------------------------------------------|-----------------------------------------------------|---------|-------|---------------------------|
| Hurricane Sandy | NJ | 69.0 | Swerdel et al. (2014) | 362.3; 430.X; 431.X; 432.9; 433.01; 433.11; 433.21; 433.31; 433.81; 433.91; 434.01; 434.11; 434.9; 436.X; 435.X; 997.02 | Stroke                                              | 1,465.0 | 0.0   | Swerdel et al. (2014)     |
| Hurricane Sandy | NJ |      |                       | 250.x0 or 250.x2                                                                                                        | Type II Diabetes ER visits                          | 132.0   | 0.0   | Velez-Valle et al. (2016) |
| Hurricane Sandy | NJ |      |                       | E877                                                                                                                    | Open Wounds (ED visits) 65+                         | 189.0   | 197.0 | McQuade et al. (2018)     |
| Hurricane Sandy | NJ |      |                       | 800–829                                                                                                                 | Fractures (ED visits) 65+                           | 14.3    | 193.0 | McQuade et al. (2018)     |
| Hurricane Sandy | NJ |      |                       | E916–E928                                                                                                               | Injury Other (ED visits) 65+                        | 1.3     | 178.0 | McQuade et al. (2018)     |
| Hurricane Sandy | NJ |      |                       | 300.9                                                                                                                   | Mental illness (ED visits) 65+                      | 2.4     | 169.0 | McQuade et al. (2018)     |
| Hurricane Sandy | NJ |      |                       | 924.9                                                                                                                   | Contusions (ED visits) 65+                          | 0.2     | 163.0 | McQuade et al. (2018)     |
| Hurricane Sandy | NJ |      |                       | 840–848                                                                                                                 | Sprains and Strains (ED visits) 65+                 | 0.2     | 149.0 | McQuade et al. (2018)     |
| Hurricane Sandy | NJ |      |                       | V51.89                                                                                                                  | Unspecified and Aftercare (ED visits) 65+           | 0       | 134.0 | McQuade et al. (2018)     |
| Hurricane Sandy | NJ |      |                       | V89                                                                                                                     | Suspected Conditions (ED visits) 65+                | 0       | 109.0 | McQuade et al. (2018)     |
| Hurricane Sandy | NJ |      |                       | 536.9                                                                                                                   | Functional Digestive Issues (ED visits) 65+         | 22.7    | 103.0 | McQuade et al. (2018)     |
| Hurricane Sandy | NJ |      |                       | 466.19                                                                                                                  | Bronchitis (Unspecified) (ED visits) 65+            | 9.7     | 82.0  | McQuade et al. (2018)     |
| Hurricane Sandy | NJ |      |                       | 250                                                                                                                     | Diabetes (ED visits) 65+                            | 2.1     | 65.0  | McQuade et al. (2018)     |
| Hurricane Sandy | NJ |      |                       | 465.9                                                                                                                   | Acute Upper Respiratory Illness (ED visits) 65+     | 0.4     | 46.0  | McQuade et al. (2018)     |
| Hurricane Sandy | NJ |      |                       | 276.9                                                                                                                   | Fluid Imbalance (ED visits) 65+                     | 11.9    | 45.0  | McQuade et al. (2018)     |
| Hurricane Sandy | NJ |      |                       | 592                                                                                                                     | Calculus of Kidney and Ureter (ED visits) 65+       | 2.2     | 41.0  | McQuade et al. (2018)     |
| Hurricane Sandy | NJ |      |                       | 715.09                                                                                                                  | Osteoarthritis and Allied Disorders (ED visits) 65+ | 3.3     | 31.0  | McQuade et al. (2018)     |
| Hurricane Sandy | NJ |      |                       | E880–E888                                                                                                               | Falls (in 2013) ED and Hospital discharge           | 7.6     | 78.0  | Marshall et al. (2016)    |
| Hurricane Sandy | NJ |      |                       | E920                                                                                                                    | Cut/pierce injury ED and hospital discharge         | 3.4     | 34.0  | Marshall et al. (2016)    |
| Hurricane Sandy | NJ |      |                       | E916, E917                                                                                                              | Struck by/against ED and Hospital discharge         | 0.3     | 17.0  | Marshall et al. (2016)    |

|                 |          |                           |                        |     |                        |                                            |         |         |                         |
|-----------------|----------|---------------------------|------------------------|-----|------------------------|--------------------------------------------|---------|---------|-------------------------|
| Hurricane Sandy | NJ       |                           |                        |     | E927                   | Overexertion ED and Hospital discharge     | 0.3     | 31.0    | Marshall et al. (2016)  |
| Hurricane Sandy | NJ       |                           |                        |     | CM 585.6               | ED visit for end-stage renal disease       | 99.5    | 155.0   | Kelmen et al. (2015)    |
| Hurricane Sandy | NJ       |                           |                        |     | 39.95                  | Dialysis rec'd in ED                       |         | 24.0    | Kelmen et al. (2015)    |
| Hurricane Sandy | NJ       | 23.0                      | Kelmen et al. (2015)   |     | CM 585.6               | Hospital visit for end-stage renal disease | 79.0    | 0.0     | Kelmen et al. (2015)    |
| Hurricane Sandy | NJ       |                           |                        |     | 276.51, 276.50, 276.52 | Dehydration HA                             | 119.0   | 0.0     | Swerdel et al. (2016)   |
| Hurricane Sandy | NJ       |                           |                        |     | Gen Con 5              | Mental health counseling                   | 27.0    | 0.0     | Boscarino et al. (2013) |
| Hurricane Sandy | NJ       |                           |                        |     | F43.10                 | Mental health treatment                    | 41.0    | 0.0     | Boscarino et al. (2013) |
| Hurricane Sandy | NJ       |                           |                        |     | 986                    | CO exposures to ED                         | 14.6    | 164.3   | Schnall et al. (2017)   |
| Hurricane Sandy | NJ       |                           |                        |     | W20.8                  | Tree-related injury ED visits              | 0.2     | 39.0    | Marshall et al. (2018)  |
| Hurricane Sandy | NJ TOTAL | 251                       |                        | 0.0 |                        |                                            | 5,794.7 | 2,247.3 |                         |
| Hurricane Sandy | NY       | (NY deaths counted in NJ) | Diakakis et al. (2015) |     | 300                    | Anxiety (ED)                               | 0.9     | 56.7    | Lin et al. (2016)       |
| Hurricane Sandy | NY       |                           |                        |     | 309                    | Adjustment                                 | 12.0    | 57.6    | Lin et al. (2016)       |
| Hurricane Sandy | NY       |                           |                        |     | 297.9                  | Psychosis (ED)                             | 3.6     | 50.7    | Lin et al. (2016)       |
| Hurricane Sandy | NY       |                           |                        |     | F30                    | Mood disorder (ED)                         | 0.0     | 74.1    | Lin et al. (2016)       |
| Hurricane Sandy | NY       |                           |                        |     | 305.9                  | Substance abuse (ED)                       | 4.6     | 266.4   | Lin et al. (2016)       |
| Hurricane Sandy | NY       |                           |                        |     | V62.84                 | Suicide counseling (ED)                    | 0.1     | 7.5     | Lin et al. (2016)       |
| Hurricane Sandy | NY       |                           |                        |     | 460-519                | Respiratory health (ED)                    | 16.8    | 303.3   | Kim et al. (2016)       |
| Hurricane Sandy | NY       |                           |                        |     | 991                    | Hypothermia                                | 0.0     | 80.4    | Lee et al. (2016)       |
| Hurricane Sandy | NY       |                           |                        |     | V56                    | Dialysis                                   | 107.2   | 347     | Lin et al. (2014)       |
| Hurricane Sandy | NY       |                           |                        |     | V60                    | Homeless                                   | 0.3     | 55.8    | Lee et al. (2016)       |
| Hurricane Sandy | NY       |                           |                        |     | V46                    | Ventilator                                 | 0.0     | 52.1    | Lee et al. (2016)       |
| Hurricane Sandy | NY       |                           |                        |     | 585                    | Kidney disease (ED)                        | 27.9    | 39.0    | Lee et al. (2016)       |
| Hurricane Sandy | NY       |                           |                        |     | 496                    | COPD (ED)                                  | 1.4     | 23.3    | Lee et al. (2016)       |
| Hurricane Sandy | NY       |                           |                        |     | V68                    | Admin Encounter (ED)                       | 0.0     | 22.5    | Lee et al. (2016)       |
| Hurricane Sandy | NY       |                           |                        |     | 304                    | Drug Dependence (ED)                       | 2.0     | 19.8    | Lee et al. (2016)       |
| Hurricane Sandy | NY       |                           |                        |     | 403                    | Hypertensive Kidney Disease (ED)           | 12.0    | 13.6    | Lee et al. (2016)       |
| Hurricane Sandy | NY       |                           |                        |     | 515                    | Pulmonary Fibrosis                         | 9.8     | 13.1    | Lee et al. (2016)       |
| Hurricane Sandy | NY       |                           |                        |     | 994                    | External Exposure (ED)                     | 1.6     | 10.5    | Lee et al. (2016)       |
| Hurricane Sandy | NY       |                           |                        |     | 276                    | Electrolyte Abnormality (ED)               | 4.3     | 5.4     | Lee et al. (2016)       |

|                 |          |                                                       |                      |     |               |                                            |       |         |                         |
|-----------------|----------|-------------------------------------------------------|----------------------|-----|---------------|--------------------------------------------|-------|---------|-------------------------|
| Hurricane Sandy | NY       |                                                       |                      |     | 250           | Diabetes (ED)                              | 0.8   | 4.7     | Lee et al. (2016)       |
| Hurricane Sandy | NY       |                                                       |                      |     | All           | Elderly ED visits                          | 0.0   | 10.3    | Gotanda et al. (2015)   |
| Hurricane Sandy | NY       |                                                       |                      |     | CM 585.6      | ED visit for end-stage renal disease       | 90.8  | 141.4   | Kelmen et al. (2015)    |
| Hurricane Sandy | NY       |                                                       |                      |     | 39.95         | Dialysis rec'd in ED                       | 0.0   | 21.5    | Kelmen et al. (2015)    |
| Hurricane Sandy | NY       | 21.4                                                  | Kelmen et al. (2015) |     | CM 585.6      | Hospital visit for end-stage renal disease | 72.5  | 0.0     | Kelmen et al. (2015)    |
| Hurricane Sandy | NY       |                                                       |                      |     | 986           | CO Exposure ED                             | 22.0  | 248.0   | Schnall et al. (2017)   |
| Hurricane Sandy | NY       |                                                       |                      |     | 482.84        | Legionellosis                              | 0.0   | 1.0     | Greene et al. (2013)    |
| Hurricane Sandy | NY       |                                                       |                      |     | V60.0, 60.1   | ED for homelessness                        | 1.7   | 133.0   | Doran et al. (2016)     |
| Hurricane Sandy | NY       |                                                       |                      |     | 250.00-250.93 | ED for Diabetes                            | 6.6   | 190.3   | Lee et al. (2016)       |
| Hurricane Sandy | NY       |                                                       |                      |     | 881           | Nonfatal injuries                          | 0.4   | 58.0    | Brackbill et al. (2014) |
| Hurricane Sandy | NY       |                                                       |                      |     | 388.7         | ENT HAs                                    | 15.7  | 15.7    | Mongin et al. (2017)    |
| Hurricane Sandy | NY       |                                                       |                      |     | 518.81        | Respiratory HAs                            | 379.4 | 0.0     | Mongin et al. (2017)    |
| Hurricane Sandy | NY       |                                                       |                      |     | 238.79        | Myeloproliferative /neoplasm HAs           | 10.3  | 0.0     | Mongin et al. (2017)    |
| Hurricane Sandy | NY       |                                                       |                      |     | 309.81        | Mental disorder HAs                        | 0.6   | 0.0     | Mongin et al. (2017)    |
| Hurricane Sandy | NY       |                                                       |                      |     | 634, 640      | Threatened or spontaneous abortion         | 0.1   | 9.9     | Xiao et al. (2019)      |
| Hurricane Sandy | NY       |                                                       |                      |     | 644           | Threatened or early delivery               | 1.3   | 10.5    | Xiao et al. (2019)      |
| Hurricane Sandy | NY TOTAL | 21.4 (in addition to NY deaths already counted in NJ) |                      | 0.0 |               |                                            | 806.8 | 2,426.3 |                         |

25 **Table S1.** Health incidence data and corresponding sources for valuation analysis. Red text  
26 indicates imputed counts, “XX” indicates all numeric values between 0 and 99. Column totals  
27 may not equal component sums due to rounding.

28

## 29 Sensitivity Analysis Methods

30 For each case study, we also conducted a sensitivity analysis of morbidity and mortality impacts  
31 to illuminate uncertainty in our estimates (see Supplemental Table S2). For mortality cost  
32 estimates, we considered low and high estimates within the range of labor market values  
33 (\$1.05-24.4 million in 2018 dollars) from willingness to pay-derived estimates for the VSL (U.S.  
34 Environmental Protection Agency, 2010). While a central VSL estimate is commonly employed  
35 in regulatory impact analyses conducted by the US government (U.S. Environmental Protection  
36 Agency, 2015), alternate VSL methods provide a more dynamic estimate of an individual’s  
37 willingness to experience a change in the risk of premature death depending on baseline health  
38 status and age.

39

40 For sensitivity analyses of our cost estimates of human morbidity, we considered alternate  
 41 estimation approaches. For all case studies, we considered an alternate average estimate of the  
 42 number of days of work missed due to illness from the National Health Interview Survey (U.S.  
 43 Centers for Disease Control and Prevention, 2013), and applied this hospital LOS estimate to all  
 44 HAs and EDs before calculating lost wages, rather than the diagnosis-specific LOS values derived  
 45 from HCUP. For a subset of health studies in New Jersey and Ohio that included upper and  
 46 lower 95% confidence intervals for excess HA and ED incidence, we used these values in  
 47 alternate incidence estimates. For Nevada, our sensitivity analysis considered health-related  
 48 costs in counties exceeding the less health-protective, current NAAQS 8-hour standard for  
 49 ozone (70 parts per billion, ppb), instead of the threshold applied in the main analysis (60 ppb).  
 50 For Florida, we substituted HA and ED cost estimates from the original study (Hoagland et al.,  
 51 2014) for HCUP-estimated costs. For Michigan, we considered probable Lyme disease cases as  
 52 determined by the state, in addition to confirmed ones (Michigan Department of Community  
 53 Health, 2013). See Supplemental Table S2 for the full results of the sensitivity analyses.

54  
 55 **Sensitivity Analysis Results**

56 Although some of the health incidence data we utilized provided estimates of uncertainty, we  
 57 were unable to calculate 95% confidence intervals for our cost estimates because of our  
 58 combination of data from epidemiologic studies and the range of data sources identified in  
 59 Figure 2; rather, the ranges listed in Supplemental Table S2 are driven by alternate approaches  
 60 to estimating incidence, VSL and LOS (see Sensitivity Analysis Methods above). Our estimate of  
 61 lost wages (Table 4 in the main text) may be too high because we included all HAs and EDs  
 62 (rather than a fraction representing the working-age population) in this calculation. However,  
 63 we only included lost wages for individuals who sought medical care and for conditions that  
 64 HCUP provided LOS information for; many more people not included in these estimates may  
 65 have lost wages from climate change-induced illnesses, for example working adult caregivers  
 66 who stayed home from work to care for sick children or older adults.

67

| (A) State | (B) Event         | (C) Deaths                 | (D) Mortality (Lower Bound) | (E) Mortality (Upper Bound) | (F) Wage Sensitivity | (G) Morbidity Sensitivity | (H) Total (Lower Bound) | (I) Total (Higher Bound) |
|-----------|-------------------|----------------------------|-----------------------------|-----------------------------|----------------------|---------------------------|-------------------------|--------------------------|
|           |                   | (millions of 2018 dollars) |                             |                             |                      |                           |                         |                          |
| MI        | Lyme Disease      | 0                          | \$0                         | \$0                         | \$0.003              | \$7.9                     | \$7.9                   | \$9.7                    |
| NC        | Allergenic Pollen | 4                          | \$4.2                       | \$97.7                      | \$3.6                | \$5.8                     | \$13.6                  | \$107.1                  |



|            |                      |            |                |                   |               |                  |                  |                   |
|------------|----------------------|------------|----------------|-------------------|---------------|------------------|------------------|-------------------|
| OH         | Extreme Weather      | 8          | \$8.3          | \$195.3           | \$0.09        | \$13.4           | \$21.8           | \$208.8           |
| WI         | Extreme Heat         | 27         | \$28.3         | \$659.2           | \$0.4         | \$4.8            | \$61.5           | \$664.4           |
| FL         | Harmful Algal Blooms | 0          | \$0            | \$0               | \$3.6         | \$233.1          | \$236.7          | \$557.0           |
| NV         | Ground-level Ozone   | 97         | \$101.9        | \$2,373.0         | \$0.1         | \$3.6            | \$105.6          | \$2,376.7         |
| TX         | West Nile Virus      | 89         | \$93.3         | \$2,172.8         | \$1.0         | \$274.3          | \$368.6          | \$2,448.2         |
| CO         | Wildfires            | 174        | \$182.3        | \$4,246.8         | \$0.4         | \$22.5           | \$205.2          | \$4,269.7         |
| WA         | Wildfires            | 245        | \$256.7        | \$5,979.8         | \$0.5         | \$54.6           | \$311.9          | \$6,035.0         |
| NJ         | Hurricane Sandy      | 273*       | \$286.1        | \$6,664.9         | 1.9           | \$1,033.3        | \$1,321.3        | \$7,700.1         |
| NY         |                      |            | \$0            | \$0               | \$0.8         | \$109.2          | \$110.0          | \$222.3           |
| <b>ALL</b> |                      | <b>917</b> | <b>\$961.2</b> | <b>\$22,389.4</b> | <b>\$12.6</b> | <b>\$1,762.6</b> | <b>\$2,736.3</b> | <b>\$24,599.0</b> |

68 **Table S2.** Sensitivity analysis for estimated health-related costs of 2012 case studies (millions of  
69 2018 dollars). Columns D and E represent mortality valuation using alternate value of a  
70 statistical life (VSL) estimates. Column F represents alternate approach to estimating hospital  
71 length of stay (LOS) and associated lost wages. Column G represents alternate approach to  
72 estimating HA and ED incidence. Column H equals sum of columns D, F, and G. Column I equals  
73 sum of columns E, F, and G. For more information on sensitivity analysis methods, see  
74 supplemental text. Row and column totals may not equal component sums due to rounding.  
75 \*Hurricane Sandy mortality estimate includes deaths reported from Pennsylvania, West  
76 Virginia, Connecticut, Maryland, and those not classified by state (Diakakis et al., 2015).

77

## 78 Discussion Notes

79 While the costs associated with ED visits dominated morbidity costs in most states, all events  
80 involved hospitalizations and outpatient medical needs (outpatient care, home health visits, and  
81 prescribed medications) that, in cost terms, greatly exceeded the more immediate lost wages  
82 related to HAs and ED visits (Table 4 and Figure 3 in the main text). This effect may be due to the  
83 limited subset of health outcomes considered; given the variety of climate-sensitive health risks  
84 we face and the paucity of linkages between existing HA and ED data and climate change-related  
85 environmental exposure data, fuller consideration of human morbidity risks and costs over the  
86 months following such exposures remains an important area for future study. Interestingly, the  
87 relative shares of morbidity cost components are more comparable in the two states  
88 experiencing widespread wildfires (Colorado and Washington, see Figure 3 in the main text) than  
89 the two states for which we analyzed the effects of Hurricane Sandy. This distinction appears to  
90 stem from the close alignment in the overall range of health effects examined between Colorado  
91 and Washington as compared to cost divergence between New Jersey and New York.

92

93 Although weather conditions in any particular year may fluctuate, the long-term trends in  
94 climate-driven extreme weather events and the underreporting of certain health conditions are  
95 not in question. For example, beyond extreme heat impacts in Wisconsin (Table 3 in the main  
96 text), 24 other states had at least ten times more record high temperatures than record lows in

97 2012 (Climate Central, 2012), and at least 722 heat-related deaths and 35,123 heat-related ED  
 98 visits occurred nationwide (U.S. Centers for Disease Control and Prevention, n.d.). Moreover,  
 99 (Hess et al., 2014), analyzing data from 2006-2010, estimated about 65,299 ED annual visits for  
 100 acute heat illness nationally.

101  
 102 This work further illuminates the urgency of actions to respond to climate change and highlights  
 103 the need for robust public health preparedness and surveillance and tracking efforts to monitor  
 104 climate-sensitive health conditions.

105  
 106 **State vs. National Health Impacts**

|                                   | State-Level Case Study Estimate | National Estimate | State-Level Case Study Share of National Estimate |
|-----------------------------------|---------------------------------|-------------------|---------------------------------------------------|
| Lyme Disease (cases)              | 80                              | 22,014            | 0.4%                                              |
| Allergenic Oak Pollen (ED visits) | 1,149                           | 21,200            | 5.4%                                              |
| Extreme Weather (deaths)          | 8                               | 79                | 10.1%                                             |
| Extreme Heat (deaths)             | 27                              | 722               | 3.7%                                              |
| Ozone (deaths)                    | 97                              | 6,410             | 1.5%                                              |
| West Nile Virus (deaths)          | 89                              | 286               | 31.1%                                             |
| Wildfires (deaths)                | 419                             | 12,810            | 3.3%                                              |
| Hurricanes (deaths)               | 273                             | 281               | 97.2%                                             |

107 **Table S3.** Comparison of state-level case study health impacts to national estimates (data used  
 108 for Figure 4 in main text).

109  
 110  
 111 **References for Supplemental Material**

112  
 113 Bandala, E. R., Kebede, K., Jonsson, N., Murray, R., Green, D., Mejia, J. F., & Martinez-Austria, P.  
 114 F. (2019). Extreme heat and mortality rates in Las Vegas, Nevada: inter-annual variations  
 115 and thresholds. *International Journal of Environmental Science and Technology*.  
 116 <https://doi.org/10.1007/s13762-019-02357-9>  
 117 Brackbill, R. M., Caramanica, K., Maliniak, M., Stellman, S. D., Fairclough, M. A., Farfel, M. R., et  
 118 al. (2014). Nonfatal Injuries 1 Week After Hurricane Sandy — New York City  
 119 Metropolitan Area, October 2012, *63*(42), 5.

120 Chakraborty, J., Collins, T. W., Montgomery, M. C., & Grineski, S. E. (2014). Social and Spatial  
121 Inequities in Exposure to Flood Risk in Miami, Florida. *Natural Hazards Review*, 15(3),  
122 04014006. [https://doi.org/10.1061/\(ASCE\)NH.1527-6996.0000140](https://doi.org/10.1061/(ASCE)NH.1527-6996.0000140)

123 Chakraborty, J., Collins, T. W., & Grineski, S. E. (2019). Exploring the Environmental Justice  
124 Implications of Hurricane Harvey Flooding in Greater Houston, Texas. *American Journal*  
125 *of Public Health*, 109(2), 244–250. <https://doi.org/10.2105/AJPH.2018.304846>

126 Climate Central. (2012, September 12). 2012 Record Temperatures: Which States Led the  
127 Nation. Retrieved June 26, 2019, from [https://www.climatecentral.org/news/2012-](https://www.climatecentral.org/news/2012-record-temperatures-which-states-led-the-nation-14951)  
128 [record-temperatures-which-states-led-the-nation-14951](https://www.climatecentral.org/news/2012-record-temperatures-which-states-led-the-nation-14951)

129 Davies, B. W., Smith, J. M., Hink, E. M., & Durairaj, V. D. (2017). Increased Incidence of Rhino-  
130 Orbital-Cerebral Mucormycosis After Colorado Flooding. *Ophthalmic Plastic and*  
131 *Reconstructive Surgery*, 33, S148–S151.  
132 <https://doi.org/10.1097/IOP.0000000000000448>

133 Declet-Barreto, J., Knowlton, K., Jenerette, G. D., & Buyantuev, A. (2016). Effects of Urban  
134 Vegetation on Mitigating Exposure of Vulnerable Populations to Excessive Heat in  
135 Cleveland, Ohio. *Weather, Climate, and Society*, 8(4), 507–524.  
136 <https://doi.org/10.1175/WCAS-D-15-0026.1>

137 Diakakis, M., Deligiannakis, G., Katsetsiadou, K., & Lekkas, E. (2015). Hurricane Sandy mortality  
138 in the Caribbean and continental North America. *Disaster Prevention and Management:*  
139 *An International Journal*, 24(1), 132–148. <https://doi.org/10.1108/DPM-05-2014-0082>

140 Greenstone, M., Kopits, E., & Wolverton, A. (2013). Developing a Social Cost of Carbon for US  
141 Regulatory Analysis: A Methodology and Interpretation. *Review of Environmental*  
142 *Economics and Policy*, 7(1), 23–46. <https://doi.org/10.1093/reep/res015>

143 Hess, J. J., Saha, S., & Luber, G. (2014). Summertime Acute Heat Illness in U.S. Emergency  
144 Departments from 2006 through 2010: Analysis of a Nationally Representative Sample.  
145 *Environmental Health Perspectives*, 122(11), 1209–1215.  
146 <https://doi.org/10.1289/ehp.1306796>

147 Hoagland, Jin, D., Beet, A., Kirkpatrick, B., Reich, A., Ullmann, S., et al. (2014). The human health  
148 effects of Florida Red Tide (FRT) blooms: An expanded analysis. *Environment*  
149 *International*, 68, 144–153. <https://doi.org/10.1016/j.envint.2014.03.016>

150 Isaksen, T. B., Yost, M., Hom, E., & Fenske, R. (2014). Projected health impacts of heat events in  
151 Washington State associated with climate change. *Reviews on Environmental Health*,  
152 29(1–2), 119–123. <https://doi.org/10.1515/reveh-2014-0029>

153 Keim, M. E. (2008). Building Human Resilience. *American Journal of Preventive Medicine*, 35(5),  
154 508–516. <https://doi.org/10.1016/j.amepre.2008.08.022>

155 Kishore, N., Marqués, D., Mahmud, A., Kiang, M. V., Rodriguez, I., Fuller, A., et al. (2018).  
156 Mortality in Puerto Rico after Hurricane Maria. *New England Journal of Medicine*,  
157 379(2), 162–170. <https://doi.org/10.1056/NEJMsa1803972>

158 Kornhuber, K., Osprey, S., Coumou, D., Petri, S., Petoukhov, V., Rahmstorf, S., & Gray, L. (2019).  
159 Extreme weather events in early summer 2018 connected by a recurrent hemispheric  
160 wave-7 pattern. *Environmental Research Letters*, 14(5), 054002.  
161 <https://doi.org/10.1088/1748-9326/ab13bf>

162 Kovach, M. M., Konrad, C. E., & Fuhrmann, C. M. (2015). Area-level risk factors for heat-related  
163 illness in rural and urban locations across North Carolina, USA. *Applied Geography*, *60*,  
164 175–183. <https://doi.org/10.1016/j.apgeog.2015.03.012>

165 McQuade, L., Merriman, B., Lyford, M., Nadler, B., Desai, S., Miller, R., & Mallette, S. (2018).  
166 Emergency Department and Inpatient Health Care Services Utilization by the Elderly  
167 Population: Hurricane Sandy in The State of New Jersey. *Disaster Medicine and Public*  
168 *Health Preparedness*, 1–9. <https://doi.org/10.1017/dmp.2018.1>

169 Michigan Department of Community Health. (2013, June). Michigan Zoonotic & Vector-Borne  
170 Disease Surveillance Summary. Retrieved June 26, 2019, from  
171 [https://www.michigan.gov/documents/emergingdiseases/LD\\_2012\\_summary\\_432339\\_](https://www.michigan.gov/documents/emergingdiseases/LD_2012_summary_432339_7.pdf)  
172 [7.pdf](https://www.michigan.gov/documents/emergingdiseases/LD_2012_summary_432339_7.pdf)

173 Mora, C., Spirandelli, D., Franklin, E. C., Lynham, J., Kantar, M. B., Miles, W., et al. (2018). Broad  
174 threat to humanity from cumulative climate hazards intensified by greenhouse gas  
175 emissions. *Nature Climate Change*. <https://doi.org/10.1038/s41558-018-0315-6>

176 Ricke, K., Drouet, L., Caldeira, K., & Tavoni, M. (2018). Country-level social cost of carbon.  
177 *Nature Climate Change*, *8*(10), 895–900. <https://doi.org/10.1038/s41558-018-0282-y>

178 Salas, R. N., Jacobs, W., & Perera, F. (2019). The Case of Juliana v. U.S. — Children and the  
179 Health Burdens of Climate Change. *N Engl J Med*, *3*.

180 Santos-Burgoa, C., Sandberg, J., Suárez, E., Goldman-Hawes, A., Zeger, S., Garcia-Meza, A., et al.  
181 (2018). Differential and persistent risk of excess mortality from Hurricane Maria in  
182 Puerto Rico: a time-series analysis. *The Lancet Planetary Health*, *2*(11), e478–e488.  
183 [https://doi.org/10.1016/S2542-5196\(18\)30209-2](https://doi.org/10.1016/S2542-5196(18)30209-2)

184 Santos-Lozada, A. R., & Howard, J. T. (2018). Use of Death Counts From Vital Statistics to  
185 Calculate Excess Deaths in Puerto Rico Following Hurricane Maria. *JAMA*, 320(14), 1491–  
186 1493. <https://doi.org/10.1001/jama.2018.10929>

187 Schatz, J., & Kucharik, C. J. (2015). Urban climate effects on extreme temperatures in Madison,  
188 Wisconsin, USA. *Environmental Research Letters*, 10(9), 094024.  
189 <https://doi.org/10.1088/1748-9326/10/9/094024>

190 Spangler, K. R., Manjourides, J., Lynch, A. H., & Wellenius, G. A. (2019). Characterizing Spatial  
191 Variability of Climate-Relevant Hazards and Vulnerabilities in the New England Region of  
192 the United States. *GeoHealth*, 3(4), 104–120. <https://doi.org/10.1029/2018GH000179>

193 U.S. Centers for Disease Control and Prevention. (2013). National Health Interview Survey  
194 (NHIS), 2012 Episode Public Use File (injqoiep). Retrieved June 25, 2019, from  
195 [ftp://ftp.cdc.gov/pub/Health\\_Statistics/NCHS/Dataset\\_Documentation/NHIS/2012/Injqoiep\\_freq.pdf](ftp://ftp.cdc.gov/pub/Health_Statistics/NCHS/Dataset_Documentation/NHIS/2012/Injqoiep_freq.pdf)  
196

197 U.S. Centers for Disease Control and Prevention. (n.d.). National Environmental Public Health  
198 Tracking. Retrieved June 20, 2019, from  
199 <https://www.cdc.gov/nceh/tracking/default.htm>

200 U.S. Environmental Protection Agency. (2010). *Guidelines for Preparing Economic Analyses:*  
201 *Mortality Risk Valuation Estimates (Appendix B)*. Retrieved from  
202 <https://www.epa.gov/sites/production/files/2017-09/documents/ee-0568-22.pdf>

203 U.S. Environmental Protection Agency. (2015). *Regulatory Impact Analysis for the Clean Power*  
204 *Plan Final Rule (No. EPA-452/R-15-003)*. Retrieved from

205 [https://www3.epa.gov/ttnecas1/docs/ria/utilities\\_ria\\_final-clean-power-plan-existing-](https://www3.epa.gov/ttnecas1/docs/ria/utilities_ria_final-clean-power-plan-existing-)  
206 [units\\_2015-08.pdf](https://www3.epa.gov/ttnecas1/docs/ria/utilities_ria_final-clean-power-plan-existing-)

207 U.S. Global Change Research Program. (2018). *Fourth National Climate Assessment, Volume II:*  
208 *Impacts, Risks, and Adaptation in the United States* (p. 1515). Washington, D.C.: US

209 Global Change Research Program. Retrieved from <https://nca2018.globalchange.gov/>

210
